# Supplementary material
Source: PubMed Central journal article supplement (PMC6399505)
Supplement: 10.1194_D090795_jlr.D090795-2.pdf [file 10.1194_D090795_jlr.D090795-2.pdf]

**Supplemental Table S1** – Lipid composition of SPLASH LipidoMix™, which contains a mixture of all major lipid classes found in biological samples.

| Lipid Species           | Concentration (µg/mL) |
|-------------------------|-----------------------|
| PC(15:0_18:1{d7})       | 160.7                 |
| PE (15:0_18:1{d7})      | 50.8                  |
| PS(15:0_18:1{d7})       | 203.7                 |
| PG(15:0_18:1{d7})       | 29.1                  |
| PI(15:0_18:1{d7})       | 900.8                 |
| PA(15:0_18:1{d7})       | 357.4                 |
| LPC(18:1{d7})           | 25.5                  |
| LPE(18:1{d7})           | 95.0                  |
| CE(18:1{d7})            | 356.1                 |
| MAG(18:1{d7})           | 199.7                 |
| DAG(15:0_18:1{d7})      | 9.4                   |
| TAG(15:0_18:1{d7}_15:0) | 57.3                  |
| SM(18:1{d7})            | 30.9                  |
| Cer(15:0{d7})           | 19.7                  |
