# Supplementary material
Source: PubMed Central journal article supplement (PMC6399505)
Supplement: 10.1194_D090795_jlr.D090795-3.pdf [file 10.1194_D090795_jlr.D090795-3.pdf]

**Supplemental Table S2** – Fatty acids monitored by single ion monitoring (SIM) in the GC-MS fatty acid profiling technique.

| Fatty Acid            | Monitored Ions ( $m/z$ ) | Time Window (min) |
|-----------------------|--------------------------|-------------------|
| FA(14:0)              | 227.4                    | 3.50-9.20         |
| FA(15:0)              | 241.4                    | 3.50-9.20         |
| FA(16:0)              | 255.4                    | 9.20-10.00        |
| FA(16:1( $\Omega$ 7)) | 253.4                    | 9.20-10.00        |
| FA(17:0)              | 269.7                    | 10.00-10.80       |
| FA(18:0)              | 283.4                    | 10.80-11.70       |
| FA(18:1( $\Omega$ 7)) | 281.4                    | 10.80-11.70       |
| FA(18:1( $\Omega$ 9)) | 281.4                    | 10.80-11.70       |
| FA(18:2( $\Omega$ 6)) | 279.4                    | 10.80-11.70       |
| FA(18:3( $\Omega$ 3)) | 277.4                    | 10.80-11.70       |
| FA(18:3( $\Omega$ 6)) | 277.4                    | 10.80-11.70       |
| FA(20:0)              | 311.5                    | 11.70-13.50       |
| FA(20:1( $\Omega$ 9)) | 309.5                    | 11.70-13.50       |
| FA(20:2( $\Omega$ 6)) | 307.5                    | 11.70-13.50       |
| FA(20:3( $\Omega$ 3)) | 305.5                    | 11.70-13.50       |
| FA(20:4( $\Omega$ 6)) | 303.5                    | 11.70-13.50       |
| FA(20:5( $\Omega$ 3)) | 301.5                    | 11.70-13.50       |
| FA(22:0)              | 339.6                    | 13.50-16.00       |
| FA(22:1( $\Omega$ 9)) | 337.6                    | 13.50-16.00       |
| FA(22:2( $\Omega$ 6)) | 335.6                    | 13.50-16.00       |
| FA(22:3( $\Omega$ 3)) | 333.6                    | 13.50-16.00       |
| FA(22:6( $\Omega$ 3)) | 327.6                    | 13.50-16.00       |
