# Supplementary material
Source: PubMed Central journal article supplement (PMC6399505)

**Supplemental Figure S2** – Extracted ion chromatogram of PE(38:4) and PC(36:3) species found in bovine liver extracts. The data was obtained by LC-MS phospholipid profile. The lipids were extracted by Bligh/Dyer (BD) and three phase liquid extraction (3PLE).

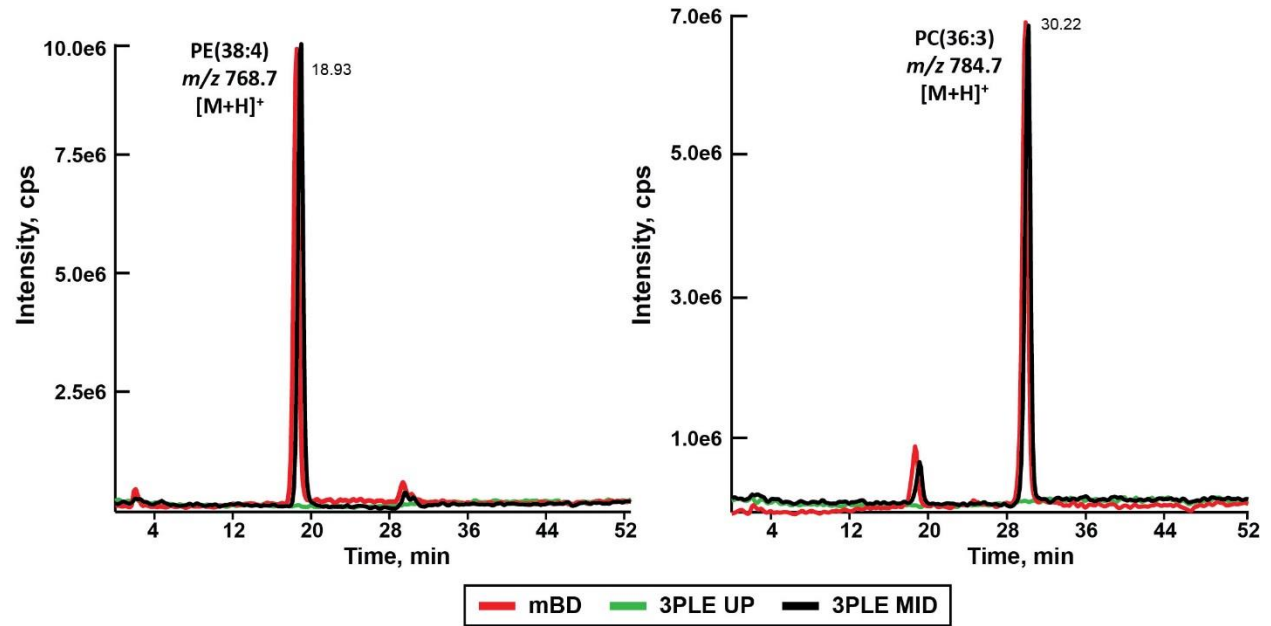

Supplement: 10.1194_D090795_jlr.D090795-4.pdf [file 10.1194_D090795_jlr.D090795-4.pdf]
