# Supplementary material
Source: PubMed Central journal article supplement (PMC6399505)

**Supplemental Figure S1** – Bovine liver extract most abundant, A) neutral lipids and B) phospholipids obtained by direct-infusion MS/MS<sup>ALL</sup>. The values are expressed as mean and standard error (n=4, \*P<0.05, \*\*P<0.01). nd – non detected.

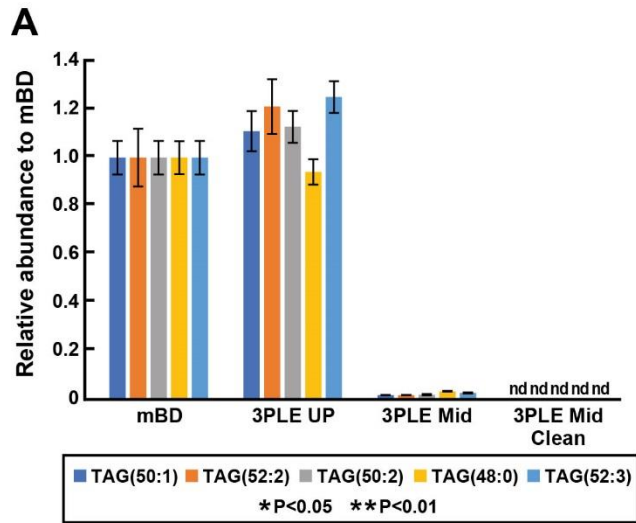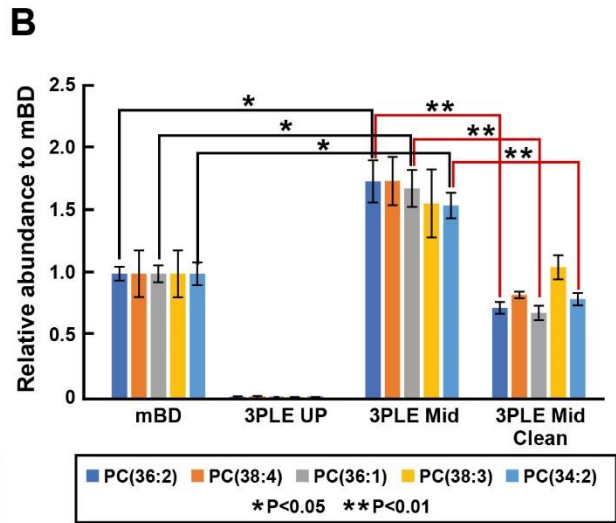

Supplement: 10.1194_D090795_jlr.D090795-5.pdf [file 10.1194_D090795_jlr.D090795-5.pdf]
